1

2 ***Phanerochaete chrysosporium* strain B-22, a parasitic fungus infecting *Meloidogyne***

3 ***incognita***

4

5 **Short title: *Phanerochaete chrysosporium* B-22 infects root-knot nematodes**

6

7

8

9 Bin Du<sup>1,2</sup>, Yumei Xu<sup>1</sup>, Hailong Dong<sup>1</sup>, Li Yan<sup>2</sup>, Jianming Wang<sup>1\*</sup>

10

11

12 <sup>1</sup>Agricultural College, Shanxi Agricultural University, Taigu, Shanxi 030801, China

13 <sup>2</sup>Department of Horticulture, Taiyuan University, Taiyuan, Shanxi 030012, China

14

15

16 \*Corresponding author: Jianming Wang

17 Email: wanglaoshi0354@163.com

18 Address: No. 1 Mingxian Road, Taigu, Shanxi Province 030801, China

19

20

21

22

23

24

25

26 **Abstract**

27 We characterized the parasitism by strain B-22 of *Phanerochaete chrysosporium* on  
28 the eggs, second stage juveniles (J2), and adult females of the root-knot nematode  
29 (*Meloidogyne Incognita*) . Strain B-22 had a strong lethal effect against *M. incognita* J2.  
30 The highest corrected mortality was 71.9% at  $3 \times 10^8$  conidia mL<sup>-1</sup>. The estimated LC<sub>50</sub>  
31 value was  $0.96 \times 10^8$  conidia mL<sup>-1</sup>. Strain B-22 parasitized *M. incognita* eggs 2 days after  
32 treatment, causing the depression and dissolution of egg shells. The fungal spores  
33 parasitized J2 by gathering in the body wall, germinating to develop hyphae, and crossing  
34 the juvenile cuticle to dissolve it, thereby causing the shrinkage and deformation of the  
35 juvenile body wall. The spores and hyphae also attacked adult females, causing the  
36 shrinkage and dissolution of their bodies and leakage of contents in 5 days. Results of  
37 greenhouse experiments showed that different concentrations of *P. chrysosporium*  
38 effectively controlled different life stages of *M. incognita* and root knot symptoms in  
39 tomato plants. Moreover, the control efficacy increased with increasing conidial  
40 concentration; the best results were achieved with  $3 \times 10^8$  cfu mL<sup>-1</sup>. In the roots, the  
41 highest inhibition rate was 84.61% for adult females, 78.91% for juveniles, 84.25% for the  
42 egg mass, and 79.48% for the gall index. The highest juvenile inhibition rate was 89.18%  
43 in the soil. Meanwhile, strain B-22 improved the plant growth. Thus, *P. chrysosporium*  
44 strain B-22 is safe for tomato plants while effectively parasitizing *M. incognita*, making it a  
45 promising biocontrol agent against *M. incognita*.

46

47 **Keywords:** *Phanerochaete chrysosporium*, *Meloidogyne incognita*, parasitism,  
48 nematophagous fungus, pathogenicity, biocontrol agent

49

## 50 Introduction

51 Plant-parasitic nematodes are very common in controlled-environment agriculture and  
52 cause economic losses via reduction in greens quality and quantity. Global agricultural  
53 losses caused by plant-parasitic nematodes have been estimated at more than \$157 billion  
54 [1]. Root-knot nematodes (*Meloidogyne* spp.), which comprise 98 species and parasitize  
55 almost every species of vascular plants [2], are the most economically important  
56 destructive obligate plant-parasitic nematodes. They occur globally, especially in tropical  
57 and subtropical agricultural areas, and cause significant yield losses annually (at least \$77  
58 billion) to world crops [3]. *Meloidogyne incognita* is one of the most important species in  
59 the genus *Meloidogyne*, and it causes dramatic yield losses in many cash crops (such as  
60 tomato) in controlled-environment agriculture, which is the main approach to produce  
61 vegetables and an important stepping stone to modern agriculture in China. The intensive  
62 production, rich soil fertility, suitable soil temperature and moisture, and lack of effective  
63 crop rotation in controlled-environment agriculture provide highly favorable conditions for  
64 the growth and propagation of *M. incognita*. After 3~5 years of cultivation under  
65 controlled conditions with *M. incognita* infection, the crop yield loss is 20–40% or  
66 sometimes even up to 60% [4]. *M. incognita* infects the roots of almost all cultivated plants  
67 in controlled-environment agriculture, impedes plants' uptake of water and nutrients due to  
68 the formation of giant cells in the roots, and facilitates infection by soil pathogenic  
69 microorganisms. Moreover, *M. incognita* is difficult to control because of its wide host  
70 range, short generation time, and high reproductive rate [5]. For example, *M. incognita* can  
71 infect 1,700 plant species [6]. In China, most greenhouse-grown vegetables are infected  
72 with *M. incognita*, causing annual losses of more than \$400 million [7]. For these reasons,  
73 *M. incognita* has become a prominent problem in controlled-environment agriculture in  
74 China.

75 At present, prevention and control measures against root-knot nematodes include  
76 sanitation, crop rotation, the use of organic soil amendments, trap crops, grafting,  
77 fertilization, heat-based methods, cultivation of resistant cultivars, transgenic varieties,  
78 chemical control, etc. [8,9]. The application of chemical nematicides is the most  
79 extensively used and efficient method for the control of *M. incognita*. However, chemical  
80 nematicides pose serious threats to the environment and human health and are costly for  
81 growers; therefore, the use of chemical nematicides is increasingly being limited or banned  
82 [10]. Thus, developing safe, environmentally friendly, and non-toxic alternative methods  
83 effective in controlling *M. incognita* are urgently needed. Biocontrol agents provide an  
84 alternative strategy for sustainable *M. incognita* management [11,12].

85 Fungi are an important group of microorganisms that are abundant in soil, and some of  
86 these microbes have been characterized for the biocontrol of plant-parasitic nematodes.  
87 Nematophagous fungi reduce nematode density by parasitism, predation, or antagonism.  
88 Several species of nematophagous fungi have been isolated from around the world. These  
89 fungi include *Acremonium strictum*, *Arthrobotrys robusta*, *Catenaria auxiliaris*, *Dactylella*  
90 *oviparasitica*, *Hirsutella rhossiliensis*, *Nematophthora gynophila*, *Paecilomyces lilacinus*,  
91 *Pochonia chlamydosporium*, and *Trichoderma harzianum* [13-19]. Many  
92 nematode-parasitic fungi have been extensively reported. On the basis of the mechanism of  
93 attack on nematodes, nematophagous fungi can be categorized into four major groups:  
94 nematode-trapping, endoparasitic, egg-parasitic, and toxin-producing fungi.  
95 Nematode-trapping fungi produce trapping devices or specialized structures, which include  
96 adhesive networks, adhesive knobs, constricting rings, and adhesive branches, to capture  
97 nematodes. Endoparasitic fungi use their adhesive conidia to infect nematodes. These  
98 conidia rapidly germinate into hyphae, which can grow, digest, and penetrate the nematode  
99 body wall. Egg-parasitic fungi infect nematode eggshells by specialized pegs or

100 appressoria. Simultaneously, these fungi usually produce extracellular hydrolytic enzymes  
101 such as proteases and chitinases that play important roles in disintegrating nematode  
102 eggshell layers. Toxin-producing fungi produce toxins to paralyze nematodes, and they  
103 produce hyphae that can penetrate through and dissolve nematode cuticles [20].

104 White-rot fungi are used for the removal of toxic pollutants from wastewater [21] and  
105 for the improvement of the environment. They can also decompose organic matter such as  
106 grass seeds and pathogens from agricultural soils by composting [22]. White-rot fungi  
107 commonly inhabit forest litter and fallen trees; they have a strong degradation potential for  
108 organic compounds owing to their extracellular oxidative enzymes such as oxidases and  
109 peroxidases. These microbes have been demonstrated to efficiently depolymerize, degrade,  
110 and mineralize all components of plant cell walls, including cellulose, hemicellulose, and  
111 the more recalcitrant lignin [23]. *Pleurotus ostreatus*, a white-rot basidiomycete, can  
112 produce toxin droplets to attack and consume nematodes [24,25]. The gene sequences  
113 encoding fruiting body lectins of *Pleurotus cornucopiae* are similar with the lectin of a  
114 nematode-trapping fungus [26]. *Phanerochaete chrysosporium* is also a white-rot  
115 basidiomycete, which can produce diverse extracellular enzymes in the growing hyphal  
116 mass [27]. Moreover, the use of *P. chrysosporium* in soil has been shown to be effective in  
117 controlling cut chrysanthemum wilt disease by *Fusarium oxysporum* and in improving  
118 plant physiological status [28]. The inoculation of *P. chrysosporium* in greenhouse soil has  
119 been shown to help overcome the problems of continuous cropping of cucumber by greatly  
120 reducing the occurrence of root wilt and root-knot nematode diseases and reducing the  
121 relative disease index of root-knot nematodes [29].

122 The aims of this study were to evaluate the efficacy of *P. chrysosporium* strain B-22  
123 isolated from soil samples from tomato greenhouses in Taigu, Shanxi Province, China, for  
124 the biocontrol of the Southern root-knot nematode *M. incognita* under in vitro and field

125 conditions, and to assess the safety of this strain for plant growth. Our results might  
126 provide the basis for the development of *P. chrysosporium* as a bio-pesticide for the  
127 control of *M. incognita* in greenhouse-grown vegetables. The results will provide new  
128 strategies for the theoretical and practical management of *M. incognita*.

129

## 130 **Materials and methods**

### 131 ***Nematode Inoculum Preparation***

132 Infected tomato roots were collected from a tomato under greenhouse field on Taigu  
133 (Shanxi province, China) and single egg mass was cultured on tomato as inoculum to  
134 establish nematode population for experiment. The species of nematode was identified as  
135 *M. incognita* on the basis of the morphological and morphometrical characters[30]. Egg  
136 masses were directly extracted from infected root galls using 1% sodium hypochlorite  
137 (NaClO), and separated eggs was gently washed with sterile water to remove the NaClO  
138 [31]. Egg masses were kept in distilled water in dark at 25°C for 48h. Then the hatched  
139 juveniles were counted for survival under stereoscopic microscope (Nikon Instruments Inc.,  
140 Tokyo, Japan). The suspensions of *M. incognita* were diluted to approximately 200  
141 juveniles per milliliter with distilled water. After surface sterilized, the eggs, juveniles and  
142 females were stored at 4 °C for subsequent trials.

143

### 144 ***Phanerochaete Chrysosporium Inoculum Preparation***

145 *P. chrysosporium* B-22 was obtained from Plant pathology department, Shanxi  
146 Agriculture University in China and was cultured with potato-dextrose agar medium. The  
147 *P. chrysosporium* was morphologically identified as Burdsall [32]. Five days after  
148 incubation at 25 °C, the purified *P. chrysosporium* B-22 was used to produce spore  
149 suspensions for inoculation, then spore suspensions were adjusted to obtain  $3 \times 10^8$  cfu mL<sup>-1</sup>

150 for treatments with autoclaved distilled water and counted using hemocytometer [33].

151

152 ***Parasitic effect of P. chrysosporium strain B-22 on the eggs, J2, and adult females of M.***

153 ***incognita***

154 Root samples infected with *M. incognita* were collected from greenhouse-grown  
155 tomato plants in Taigu, Shanxi Province, China. The root samples were gently washed with  
156 sterile water and further processed in the Laboratory of Nematology at Shanxi Agricultural  
157 University, Taigu. *M. incognita* egg masses and adult females were directly collected from  
158 the root samples. Adult females having surface sterilising with 1% NaOCl were suspended  
159 in sterile water and the density adjusted to 100 females mL<sup>-1</sup>. Egg masses were added into  
160 sterile petri dishes with sterile water and incubated at 25 °C ± 1 °C for 3 days in the dark to  
161 hatch the *M. incognita* J2, which having surface sterilising with 1% NaOCl were then  
162 incubated to obtain a 1,000 J2 mL<sup>-1</sup> suspension. Egg masses were centrifuged in 1%  
163 NaOCl at 2,000 rpm for 3 min, and free eggs were collected to prepare a 3,000 eggs mL<sup>-1</sup>  
164 suspension.

165 The parasitic effects of strain B-22 on the eggs of *M. incognita* were determined as  
166 described by Zhang et al. [34]. In brief, 100 µL of *M. incognita* egg suspension (about 300  
167 eggs) was placed in a sterile petri dish containing strain B-22 spore suspension at 3 × 10<sup>8</sup>  
168 cfu mL<sup>-1</sup>. A blank control was prepared with an equal volume of sterile water instead of the  
169 strain B-22 spore suspension. Petri dishes were incubated at 25 °C ± 1 °C for 3 days.  
170 Samples were taken for microscopic examination using a Nikon 80i microscope with an  
171 image analysis system (Nikon Instruments Inc.).

172 The parasitic effects of strain B-22 on *M. incognita* J2 were determined according to  
173 Schwartz [35]. Briefly, 100 µL of *M. incognita* J2 suspension (about 100 J2) was placed in  
174 a sterile petri dish containing strain B-22 spore suspension at 3 × 10<sup>8</sup> cfu mL<sup>-1</sup>; these petri

175 dishes were incubated at  $25\text{ }^{\circ}\text{C} \pm 1\text{ }^{\circ}\text{C}$  for 1 day, after which *M. incognita* J2 were picked  
176 up and placed on a prepared glass slide with 4% agarose for examination by fluorescence  
177 microscopy with an image analysis system (Nikon 80i microscope). Microscopic  
178 examinations were performed 2 days later.

179 The parasitic effects of strain B-22 on *M. incognita* adult females were determined  
180 according to Dong et al. [36]. Briefly, strain B-22 was grown on water agar (WA) until the  
181 colony diameter reached near the edge of the dish. Sterile coverslips were placed in the  
182 WA, and adult females (about 10 females) were transferred onto the coverslips and  
183 incubated at  $25\text{ }^{\circ}\text{C} \pm 1\text{ }^{\circ}\text{C}$  for 5 days. A control group was prepared without strain B-22.  
184 Samples were subjected to microscopic examination using the Nikon 80i microscope with  
185 an image analysis system.

186

187 ***Lethal effect of P. chrysosporium strain B-22 on the second-stage juveniles of M.***  
188 ***incognita***

189 Second-stage juveniles (J2) of *M. incognita* (about 100 J2  $100\text{ }\mu\text{L}^{-1}$ ) were placed in  
190 sterile petri dishes containing  $1.875 \times 10^7$ ,  $3.75 \times 10^7$ ,  $7.5 \times 10^7$ ,  $1.5 \times 10^8$ , and  $3 \times 10^8$  cfu  
191  $\text{mL}^{-1}$  of a conidial suspension of *P. chrysosporium* strain B-22, as determined by a  
192 Neubauer hemocytometer. Control contained sterile water and a suspension of *M.*  
193 *incognita* J2. Petri dishes were incubated at  $25\text{ }^{\circ}\text{C} \pm 1\text{ }^{\circ}\text{C}$  for 72 h, and samples were taken  
194 at 24 h intervals to count the number of dead J2 using a Nikon stereomicroscope (Nikon  
195 Instruments Inc., Tokyo, Japan).

196 The mortality of *M. incognita* J2 was determined by the visual inspection of stiff  
197 individuals that stayed motionless after a gentle probe with a bamboo needle. The results  
198 were used to calculate the mortality and corrected mortality rates (%) of *M. incognita* J2.  
199 The median lethal dose ( $\text{LC}_{50}$ ) of strain B-22 conidia for *M. incognita* J2 was determined



200 by simple linear regression analysis of the conidial concentration of strain B-22 and  
201 corrected mortality rate among J2 of *M. incognita*:  $y = ax + b$ , where “y” is the corrected  
202 mortality rate among J2 of *M. incognita* and “x” is the conidial concentration of strain  
203 B-22. Mortality (%) = (number of dead J2 in each treatment/total number of test J2) ×  
204 100%. Corrected mortality rates (%) = (number of dead J2 in each treatment – number of  
205 dead J2 in the control treatment)/(1– number of dead J2 in the control treatment) × 100%.

206

### 207 ***Greenhouse evaluation of the control efficacy of P. chrysosporium strain B-22***

208 *P. chrysosporium* strain B-22 was incubated in potato dextrose agar plates at 25 °C ±  
209 1 °C for 10 days, after which 5 mL of sterile water was pipetted onto the surface of the  
210 plates, and the spores were scraped off from the plates [37]. The spore suspension was then  
211 filtered through a fine-mesh screen (diameter 0.15 mm) to separate the spores from the  
212 hyphae. The concentration of the spore suspension was determined by a Neubauer  
213 hemocytometer and then adjusted to  $1.875 \times 10^7$ ,  $3.75 \times 10^7$ ,  $7.5 \times 10^7$ ,  $1.5 \times 10^8$ , and  $3 \times$   
214  $10^8$  cfu mL<sup>-1</sup> and stored at 4 °C until use.

215 A greenhouse experiment was laid in a completely randomized design with six  
216 replications (pots) using autoclaved soil sterilized at 121 °C for 2 h. Soil was individually  
217 transferred into plastic pots (4kg soil pot<sup>-1</sup>), and three seeds of the *M. incognita*-susceptible  
218 F1-hybrid tomato cultivar JG9002 were planted in each pot. When tomato seedlings were  
219 growing, each pot was treated with the above spore suspension at the following  
220 concentrations:  $1.875 \times 10^7$ ,  $3.75 \times 10^7$ ,  $7.5 \times 10^7$ ,  $1.5 \times 10^8$ , and  $3 \times 10^8$  cfu mL<sup>-1</sup>. After 15  
221 days, every pot was artificially inoculated with 1,000 *M. incognita* J2. All pots were  
222 maintained in a greenhouse at 25 °C, 16 h sunlight, and 65% relative humidity. Pots were  
223 fertilized weekly with about 3 g L<sup>-1</sup> of Poly Fertisol (N:P:K = 14:10:14) and watered daily

224 as needed. Pots inoculated with *M. incognita* J2 but not with the *P. chrysosporium* strain  
225 B-22 spore suspension served as controls, while pots that were not inoculated with *M.*  
226 *incognita* J2 or the *P. chrysosporium* strain B-22 spore suspension served as blanks.

227 After 10 weeks, plant and soil samples from all treatments were randomly collected and  
228 brought to the laboratory for counting the nematodes in the roots and the soil for the  
229 calculation of the root knot index. The count of nematodes in the soil was determined as  
230 per Castillo et al. [38]. Briefly, nematodes were extracted from 100 cm<sup>3</sup> samples of soil by  
231 centrifugal flotation. Sterilized water was used to wash the soil; then, the filtered water,  
232 which was passed through a 710 µm mesh sieve, was collected in a beaker in which it was  
233 mixed with 4% kaolin (v/v). This mixture was centrifuged at 1,100 ×g for 4 min, after  
234 which the supernatants were discarded, while pellets were resuspended in 250 mL MgSO<sub>4</sub>,  
235 and the new suspensions were centrifuged at 1,100 ×g for 3 min. Supernatants were sieved  
236 through a 5 µm mesh, and nematodes collected on the sieve were washed with sterilized  
237 water, transferred to petri dishes, and counted under a stereomicroscope. The nematode  
238 count in the roots was determined as in Sharon et al. [39]. Egg masses were dissected from  
239 the roots and treated with 0.5% NaOCl. Free eggs were collected and examined. Egg  
240 samples (about 100 eggs) were incubated in 1 mL of water for 2 days, and the hatched J2  
241 were counted. The extent of root galling damage was determined [40,41] in treatment and  
242 control pots after 10 weeks. According to root gall damage, the severity of tomato root  
243 galling was assessed on a scale from 0 to 10, where 0 = no knots on roots and 10 = all roots  
244 severely knotted or no root system. Root knot index =  $\Sigma(\text{number of diseased plants in each}$   
245  $\text{rating} \times \text{score}/\text{total number of plants investigated} \times \text{highest rating}) \times 100\%$ . Six  
246 replications of each treatment were included.

247

248 ***Safety of P. chrysosporium strain B-22 on tomato plant growth***

249 Plant height, root length, aboveground fresh mass, and root fresh mass were measured  
250 independently in each treatment and control after 10 weeks of growth. Plant height and  
251 root length were measured with a graduated ruler, while plant fresh mass was weighed on  
252 an electronic balance.

253

### 254 ***Statistical analysis***

255 All experiments were repeated six times. Data were processed using Microsoft Excel  
256 2007 and expressed as means  $\pm$  standard deviation ( $n = 6$ ). The significance of differences  
257 in the counts of females, egg masses, and juveniles in the roots; tomato root gall index; and  
258 measurements of plant height, root length, aboveground fresh mass, and root fresh mass  
259 were examined using the *t*-test and one-way analysis of variance using SPSS 17.0 (SPSS  
260 Inc., Chicago, IL, USA). Statistical significance was considered at *p*-values of less than  
261 0.05.

262

### 263 **Results**

#### 264 ***Lethal effect of strain B-22 on M. incognita J2***

265 Strain B-22 conidial concentration and treatment timing significantly influenced the  
266 mortality of *M. incognita* J2 (Table 1). Compared with the control, the mortality of J2 in  
267 these experiments was significantly ( $p < 0.05$ ) greater in all treatments the strain B-22  
268 suspension at the different conidial concentrations, from  $1.875 \times 10^7$  to  $3 \times 10^8$  cfu mL<sup>-1</sup>.  
269 Mortality increased linearly with the conidial concentration of strain B-22 and time of  
270 treatment. The result was similar for all three treatments (24 h, 48 h, and 72 h). In general,  
271 the corrected mortality rate of *M. incognita* J2 24 h after treatment was 42.8%. Moreover,  
272 corrected mortality rates of *M. incognita* J2 with the conidial concentration of  $1.875 \times 10^7$   
273 cfu mL<sup>-1</sup> was 21.6%. The highest corrected mortality (71.9%) was observed 72 h after

274 treatment with the conidial concentration of  $3 \times 10^8$  cfu mL<sup>-1</sup>. LC<sub>50</sub> values decreased with  
275 time of treatment (Table 1). Estimated LC<sub>50</sub> values were 3.6, 2.4, and  $0.96 \times 10^8$  cfu mL<sup>-1</sup>  
276 after 24, 48, and 72 h of incubation, respectively.

277

### 278 ***Parasitic effect of strain B-22 on M. incognita at different life stages***

279 *P. chrysosporium* strain B-22 quickly parasitized the eggs of *M. incognita* after 2 days  
280 of treatment. In the initial period of parasitism, the spores of strain B-22 were in contact  
281 and conglutinated with the eggs, and they geminated and produced short hyphae around  
282 them (Fig. 1a). Strain B-22 grew rapidly, causing the aggregation of the inner contents of  
283 the eggs. The hyphae of strain B-22 ran through the eggs, causing shrinking of the egg  
284 shell. More hyphae grew from the egg (Fig. 1b). Over the following 2 days, the egg shell  
285 was deformed and shrunk further. This continued until the egg shell was completely  
286 dissolved by strain B-22. The eggs were broken by the hyphae. At last, the dense mycelia  
287 of strain B-22 enveloped the egg, which at the time looked abnormal and misshapen (Fig.  
288 1c). In the controls that were not inoculated with the conidia of strain B-22, the eggs of *M.*  
289 *incognita* were intact; microscopic examination confirmed that they had a smooth surface  
290 and uniform contents (Fig. 1d).

291 Strain B-22 also parasitized *M. incognita* J2. After 3 days of incubation, the spores of  
292 strain B-22 were seen on the cuticle of J2 upon microscopic examination, as observed in  
293 the case of parasitism on eggs. Strain B-22 conidia gathered in the body wall of the J2 (Fig.  
294 2a). Spores geminated and produced hyphae from the body of J2. Thus, strain B-22 grew  
295 on the surface of the cuticle of J2 of *M. incognita* (Fig. 2b). With time, strain B-22  
296 produced more mycelium on J2 and dissolved their cuticles, causing shrinkage and  
297 deformation of their body wall (Fig. 2c). After 5 days of incubation, microscopic  
298 examination showed that the J2 cuticles were dissolved or severely deformed. Dissolved

299 residues of the bodies of J2 were seen clearly. The J2 cuticle line was bent and shrunken  
300 (Fig. 2d). Eventually, strain B-22 produced massive spores to develop a dense mycelium,  
301 and parasitized the body surface of the J2. The color of the cuticle was extensively altered  
302 (Fig. 2e). In untreated controls that were not inoculated with the conidia of strain B-22, the  
303 *M. incognita* J2 showed an intact body wall and slow movement (Fig. 2f).

304 Strain B-22 also parasitized *M. incognita* adult females. Upon 4 days of incubation, the  
305 spores of strain B-22 surrounded the adult females and stuck to their surface. The contents  
306 of the bodies of the females leaked out, and short hyphae grew out from their bodies (Fig.  
307 3a). After 7 days of treatment, strain B-22 formed dense hyphae crossing the body walls of  
308 adult females. Moreover, the adult female body looked severely atrophied and was partly  
309 dissolved due to leakage (Fig. 3b). In the untreated controls that were not inoculated with  
310 the conidia of strain B-22, *M. incognita* adult females showed complete and healthy bodies  
311 with a smooth surface and obvious boundary. Inside, the contents of the adult female body  
312 were intact (Fig. 3c).

313

#### 314 ***Greenhouse evaluation of the control efficacy against root galling by strain B-22***

315 The conidial concentration of strain B-22 significantly influenced the different stages  
316 of *M. incognita* (Table 2). The antagonistic effect of different conidial concentrations on  
317 the nematodes was significantly ( $p < 0.05$ ) greater in the treatments than in the blanks and  
318 controls. *P. chrysosporium* strain B-22 significantly decreased the quantities of J2, females,  
319 and egg masses of *M. incognita*, as well as the root gall index. The number of J2 in the soil  
320 also decreased due to treatment with strain B-22. In general, the control efficiency of *M.*  
321 *incognita* significantly increased with increasing conidial concentration of *P.*  
322 *chrysosporium* strain B-22. The inhibition ratio of the females ranged between 46.15% and  
323 84.61% in the roots, while that of the juveniles ranged from 45.57% to 78.91%, and that of

324 the egg mass was from 50.39% to 84.25%. Furthermore, the inhibition ratio of the root gall  
325 index was 33.33–79.48%; and in the soil, the inhibition ratio of the juveniles reached  
326 68.51–89.18% (Table 2).

327

### 328 ***Safety of strain B-22 for tomato plant growth***

329 The use of *P. chrysosporium* strain B-22 in soil was found to be safe for tomato plant  
330 growth, and in fact, it had a growth-promoting effect. The conidial concentration of strain  
331 B-22 significantly influenced the promotion of plant growth in tomato (Table 3). Plant  
332 height, root length, aboveground fresh mass, and root fresh mass were significantly ( $p <$   
333 0.05) greater upon treatment with *P. chrysosporium* at different conidial concentrations  
334 compared with the blanks and controls. The growth-promoting effect on tomato plants  
335 increased with increasing conidial concentration. The highest promotion was achieved by a  
336 conidial concentration of  $3 \times 10^8$  cfu mL<sup>-1</sup>. In this case, plant height was 29.5 cm; root  
337 length was 30 cm; aboveground fresh mass was 9 g; and root fresh mass was 1.5 g, while  
338 the corresponding values in the controls were 9.7 cm, 9.1 cm, 1.5 g, and 0.28 g,  
339 respectively. The highest increase rates for plant height, root length, aboveground fresh  
340 mass, and root fresh mass were 202.06%, 185.71%, 426.66%, and 292.85%, respectively  
341 (Table 3).

342

### 343 **Discussion**

344 *P. chrysosporium* is a white rot fungus. Some other such fungal genera include  
345 *Trametes*, *Bjerkandera*, *Pleurotus*, *Fomes*, *Polyporus*, *Poria*, and *Coriolus*. *Pleurotus*  
346 *ostreatus* has been identified as a nematophagous fungus [42]. From this species, Kwok et  
347 al. [43] isolated the toxin trans-2-decenedioic acid, which is toxic to nematodes. Here, *P.*  
348 *chrysosporium* proved to be just as lethal to root-knot nematodes as *P. ostreatus*. We

349 isolated *P. chrysosporium* strain B-22 as a nematophagous fungus lethal to the Southern  
350 root-knot nematode *M. incognita*. Previous studies on *P. chrysosporium* have focused on  
351 removing toxic environmental pollutants [44]. *P. chrysosporium* can produce lignin  
352 peroxidase, manganese peroxidase, and laccase [45], among others. Inoculation with *P.*  
353 *chrysosporium* can greatly reduce the disease index of wilt and root-knot nematode; thus, it  
354 might be promising to use it to overcome continuous cropping limitations, e.g., in  
355 cucumber[29]. Isolated *P. chrysosporium* has been used in the biodegradation of lignin and  
356 nicotine in tobacco stalk [46], as well as polycyclic aromatic hydrocarbons [45] and other  
357 pollutants [47,48]. Meanwhile, Xu et al. [29] used *P. chrysosporium* for the control of  
358 damping-off root wilt disease caused by the continuous cropping of cucumber. The present  
359 study identified *P. chrysosporium* as a parasitic fungus infecting *M. incognita*. The assay of  
360 the lethal effect by *P. chrysosporium* strain B-22 on the *M. incognita* J2 demonstrated that  
361 strain B-22 can control these nematodes. This assay provides the first evidence of  
362 parasitism of *P. chrysosporium* on *M. incognita*. To further confirm this case of parasitism,  
363 our study demonstrated that strain B-22 was parasitic on *M. incognita* at different life  
364 stages. This provided further strong evidence of the parasitism of *P. chrysosporium* on *M.*  
365 *incognita*.

366 In this study, *P. chrysosporium* strain B-22 parasitized the eggs of *M. incognita* by  
367 producing hyphae, which first surrounded the egg shell and then destroyed the eggs. Some  
368 studies have shown that the egg-parasitic fungi *Verticillium suchlasporium*, *P. lilacinus*,  
369 *Pochonia* spp., and *T. harzianum* can secrete protease and chitinase, which degrade certain  
370 cyst nematode proteins to effectively destroy the nematode egg shell and later parasitize  
371 and kill the eggs [49]. We speculated that the infection of *M. incognita* eggs by strain B-22  
372 might also be involved in egg shell decomposition through the production of protease and  
373 chitinase.

374 *P. chryso sporium* strain B-22 parasitized the J2 of *M. incognita* by producing sticky  
375 conidia that enveloped them. These J2 were completely destroyed after 5 days of  
376 incubation. In general, the fungal conidia first stuck to the nematode cuticle or made some  
377 structures to adhere to. Then, massive hyphae grew and crossed and invaded the nematode  
378 cuticle, causing the deformation and death of J2 by leakage. Nematode cuticle  
379 decomposition indicates that *P. chryso sporium* strain B-22 might be able to produce  
380 proteases that degrade the nematode cuticle, as reported for *Lecanicillium psalliotae*,  
381 which produces an extracellular protease to degrade the nematode body [50]. Parasitic *P.*  
382 *ostreatus*, which is another white-rot fungus that attacks nematodes, was reported to  
383 produce toxin droplets to attack nematode J2, thereby killing them in 2h [24,42,51]. It is  
384 likely that *P. chryso sporium* strain B-22 employed a similar mechanism, i.e., produced  
385 toxin droplets to attack and kill the nematode.

386 Strain B-22 produced mycelial masses on the surface of the adult females of *M.*  
387 *incognita*; thus, the females were killed by the parasitizing mycelia. Our results indicate  
388 that *P. chryso sporium* strain B-22 can parasitize *M. incognita* and thus function as a  
389 biocontrol agent.

390 Results from our greenhouse experiments clearly demonstrated that different  
391 concentrations of *P. chryso sporium* strain B-22 could control different life stages of *M.*  
392 *incognita* and root knot in tomato. Moreover, the control efficacy increased with the  
393 conidial concentration of the B-22 suspension. In contrast, *P. chryso sporium* strain B-22  
394 significantly increased plant height, root length, and aboveground and root fresh mass of  
395 tomato plants inoculated with *M. incognita*. Thus, *P. chryso sporium* strain B-22 effectively  
396 controlled *M. incognita*, while significantly improving the growth of tomato plants. These  
397 results indicate that *P. chryso sporium* strain B-22 is safe for greenhouse-grown tomato  
398 seedlings.



399 In conclusion, this study characterized the parasitism of *P. chryso sporium* strain B-22  
400 on the eggs, J2, and adult females of the *M. incognita*. We also evaluated this strain's  
401 control efficacy and safety when applied in tomato plant culture in a greenhouse. The  
402 results demonstrated the potential of *P. chryso sporium* strain B-22 as a promising  
403 biocontrol agent for the control of *M. incognita*. However, additional studies are needed to  
404 identify and characterize the molecules responsible for the toxic effect of this parasitic  
405 fungal strain on the nematode and the mechanism associated with the parasitic infection of  
406 *M. incognita*. In addition, this strain's control efficacy under field conditions and against  
407 other root-knot nematodes needs to be investigated.

408

#### 409 **Acknowledgments**

410 This work was supported by the Shanxi Provincial Science and Technology Planning  
411 Project (Grant Nos. 20120311019-3, 20133054), The Key Research and Development  
412 Program Projects in Shanxi Province (Grant Nos. 201803D221004-2), and the Basic  
413 Research Program of Shanxi Province (Grant Nos. 201801D221321).

414

#### 415 **Author contributions**

416 Jianming Wang conceived and supervised the study; Yumei Xu designed the experiments;  
417 Bin Du and Li Yan performed the experiments; Hailong Dong analyzed the data; and Bin  
418 Du wrote the manuscript.

419

#### 420 **Conflict of interest statement**

421 The authors declare no conflict of interests.

422

423

## 424 References

425

- 426 1. Abad P, Gouzy J, Aury JM, Castagnone-Sereno P, Danchin EG (2008) Genome sequence of the metazoan  
427 plant-parasitic nematode *Meloidogyne incognita*. *Nat Biotechnol* 26: 909-915.
- 428 2. Jones JT, Haegeman A, Danchin EG, Gaur HS, Helder J, et al. (2013) Top 10 plant-parasitic nematodes in  
429 molecular plant pathology. *Molecular plant pathology* 14: 946-961.
- 430 3. Ding X, Shields J, Allen R, Hussey RS (2000) Molecular cloning and characterisation of a venom allergen  
431 AG5-like cDNA from *Meloidogyne incognita*. *International Journal for Parasitology* 30: 77-81.
- 432 4. Aocheng C, Meixia G, Dongdong Y, Liangang M, Qiuxia W, et al. (2014) Evaluation of sulfuryl fluoride as a  
433 soil fumigant in China. *Pest Management Science* 70: 219-227.
- 434 5. Trudgill, Blok (2001) Apomictic, polyphagous root-knot nematodes: exceptionally successful and  
435 damaging biotrophic root pathogens. *Annu Rev Phytopathologia Mediterranea*: 39: 53-77.
- 436 6. Sasser, Eisenback, Carter, Triantaphyllou (1983) The international *Meloidogyne* project - its goals and  
437 accomplishments. *Annu Rev Phytopathol* 21: 271-288.
- 438 7. Huang WK, Sun JH, Cui JK, Wang GF, Kong LA, et al. (2014) Efficacy evaluation of fungus *Syncephalastrum*  
439 *racemosum* and nematicide avermectin against the root-knot nematode *Meloidogyne incognita* on  
440 cucumber. *Plos One* 9: e89717.
- 441 8. Abo-Korah MS (2017) Biological Control of Root-Knot Nematode, *Meloidogyne javanica* Infecting Ground  
442 Cherry, Using Two Nematophagous and Mychorrhizal Fungi. *Egyptian Journal of Biological Pest*  
443 *Control* 27(1), 2017, 111-115.
- 444 9. Marin MV, Santos LS, Gaion LA, Rabelo HO, Franco CA, et al. (2017) Selection of resistant rootstocks to  
445 *Meloidogyne enterolobii* and *M. incognita* for okra (*Abelmoschus esculentus* L. Moench). *Chilean*  
446 *journal of agricultural research* 77: 57-64.
- 447 10. Mantelin S, Bellafiore S, Kyndt T (2017) *Meloidogyne graminicola*: a major threat to rice agriculture. *Mol*  
448 *Plant Pathol* 18: 3-15.
- 449 11. Chen J, Abawi GS, Zuckerman BM (1999) Suppression of *Meloidogyne hapla* and Its Damage to Lettuce  
450 Grown in a Mineral Soil Amended with Chitin and Biocontrol Organisms. *Journal of Nematology* 31:  
451 719-725.
- 452 12. Ismail AE (2014) Growing *Jatropha Curcas* and *Jatropha Gossypifolia* as a Interculture with Sunflower  
453 for Control of *Meloidogyne Javanica* in Egypt. *International Journal of Sustainable Agricultural*  
454 *Research* 1: 39-44.
- 455 13. Verdejo-Lucas S, Ornat C, Sorribas FJ, Stchiegel A (2002) Species of Root-knot Nematodes and Fungal  
456 Egg Parasites Recovered from Vegetables in Almería and Barcelona, Spain. *Journal of Nematology*  
457 34: 405-408.
- 458 14. Ashraf MS, Khan TA (2005) Effect of opportunistic fungi on the life cycle of the root-knot nematode (*Meloidogyne javanica*) on brinjal. *Archives of Phytopathology and Plant Protection* 38: 227-233.
- 459 15. Trifonova Z, Karadjova J, Georgieva T (2009) Fungal parasites of the root-knot nematodes *Meloidogyne*  
460 spp. in southern Bulgaria. *Estonian Journal of Ecology* 58: 47-52.
- 461 16. Siddiqui ZA, Akhtar MS (2009) Effects of antagonistic fungi, plant growth-promoting rhizobacteria, and  
462 arbuscular mycorrhizal fungi alone and in combination on the reproduction of *Meloidogyne*  
463 *incognita* and growth of tomato. *Journal of General Plant Pathology* 75: 144.
- 464 17. Goswami J, Pandey RK, Tewari JP, Goswami BK (2008) Management of root knot nematode on tomato  
465 through application of fungal antagonists, *Acremonium strictum* and *Trichoderma harzianum*.  
466 *Journal of Environmental Science & Health Part B* 43: 237-240.
- 467 18. Vianene NM, Abawi GS (2000) *Hirsutella rhossiliensis* and *Verticillium chlamydosporium* as Biocontrol  
468 Agents of the Root-knot Nematode *Meloidogyne hapla* on Lettuce. *Journal of Nematology* 32: 85.
- 469 19. Anastasiadis IA, Giannakou IO, Prophetou-Athanasidou DA, Gowen SR (2008) The combined effect of  
470 the application of a biocontrol agent *Paecilomyces lilacinus*, with various practices for the control  
471 of root-knot nematodes. *Crop Protection* 27: 352-361.
- 472 20. Li J, Zou C, Xu J, Ji X, Niu X, et al. (2015) Molecular Mechanisms of Nematode-Nematophagous Microbe  
473 Interactions: Basis for Biological Control of Plant-Parasitic Nematodes. *Annual Review of*  
474 *Phytopathology* 53: 67-95.
- 475 21. Zeng G-M, Chen A-W, Chen G-Q, Hu X-J, Guan S, et al. (2012) Responses of *Phanerochaete*  
476 *chrysosporium* to Toxic Pollutants: Physiological Flux, Oxidative Stress, and Detoxification.  
477 *Environmental Science & Technology* 46: 7818-7825.
- 478

- 479 22. Zeng G-M, Huang D, Huang G, Hu T, Jiang X, et al. (2007) Composting of lead-contaminated solid waste  
480 with inocula of white-rot fungus. *Bioresource Technology* 98: 320-326.
- 481 23. Kersten P, Cullen D (2007) Extracellular oxidative systems of the lignin-degrading Basidiomycete  
482 *Phanerochaete chrysosporium*. *Fungal Genet Biol* 44: 77-87.
- 483 24. Barron GL, Thor RG (1987) Destruction of nematodes by species of *Pleurotus*. *Canadian Journal of*  
484 *Botany* 65: 774-778.
- 485 25. Satou T, Kaneko K, Li W, Koike K (2008) The toxin produced by *pleurotus ostreatus* reduces the head size  
486 of nematodes. *Biological & pharmaceutical bulletin* 31: 574-576.
- 487 26. Iijima N, Yoshino H, Ten LC, Ando A, Watanabe K, et al. (2002) Two genes encoding fruit body lectins of  
488 *Pleurotus cornucopiae*: sequence similarity with the lectin of a nematode-trapping fungus. *Biosci*  
489 *Biotechnol Biochem* 66: 2083-2089.
- 490 27. Ray A, Ayoubi-Canaan P, Hartson SD, Prade R, Mort AJ (2012) *Phanerochaete chrysosporium* produces a  
491 diverse array of extracellular enzymes when grown on sorghum. *Applied Microbiology and*  
492 *Biotechnology* 93: 2075-2089.
- 493 28. Li P, Chen J, Li Y, Zhang K, Wang H (2017) Possible mechanisms of control of *Fusarium* wilt of cut  
494 chrysanthemum by *Phanerochaete chrysosporium* in continuous cropping fields: A case study.  
495 *Scientific reports* 7: 15994.
- 496 29. Xu SX, Zhang SM, You XY, Jia XC, Wu K (2008) Degradation of soil phenolic acids by *Phanerochaete*  
497 *chrysosporium* under continuous cropping of cucumber. *Ying Yong Sheng Tai Xue Bao* 19:  
498 2480-2484.
- 499 30. Eisenback JD (1985) Detailed morphology and anatomy of second-stage juveniles, males, and females of  
500 the genus *Meloidogyne* (root-knot nematodes). In: Sasser JN, Carter CC, editors. *An advanced*  
501 *treatise on meloidogyne. vol. 1: Biology and control*. Raleigh, NC: North Carolina State University  
502 Graphics. 95–112.
- 503 31. Hussey RS, Barker KR (1973) A comparison of methods of collecting inocula of *Meloidogyne* species,  
504 including a new technique. *Plant Dis Report* 57: 1025–1028.
- 505 32. Burdsall HH, JR., ESLYN WE (1974) A new *Phanerochochaete* with a *Chrysosporium* imperfect state.  
506 *Mycotaxon* 1: 123-133.
- 507 33. Mittal N, Saxena G, Mukerji KG (1995) Integrated control of root-knot disease in three crop plants using  
508 chitin and *Paecilomyces lilacinus*. *Crop Protection* 14: 647-651.
- 509 34. Zhang SW, Liu J, Xu BL, Gu LJ, Xue YY (2013) [Parasitic and lethal effects of *Trichoderma longibrachiatum*  
510 on *Heterodera avenae*: microscopic observation and bioassay]. *Ying Yong Sheng Tai Xue Bao* 24:  
511 2955-2960.
- 512 35. Schwartz HT (2007) A protocol describing pharynx counts and a review of other assays of apoptotic cell  
513 death in the nematode worm *Caenorhabditis elegans*. *Nat Protoc* 2: 705-714.
- 514 36. Dong H, Zhou X-G, Wang J, Xu Y, Lu P (2015) *Myrothecium verrucaria* strain X-16, a novel parasitic  
515 fungus to *Meloidogyne* hapla. *Biological Control* 83: 7-12.
- 516 37. Yan XN, Sikora RA, Zheng JW (2011) Potential use of cucumber (*Cucumis sativus* L.) endophytic fungi as  
517 seed treatment agents against root-knot nematode *Meloidogyne incognita*. *J Zhejiang Univ Sci B*  
518 12: 219-225.
- 519 38. Castillo, Nico, Azcón-Aguilar (2006) Protection of olive planting stocks against parasitism of root-knot  
520 nematodes by arbuscular mycorrhizal fungi. *Plant Pathology* 55: 705-713.
- 521 39. Sharon E, Chet I, Viterbo A, Bar-Eyal M, Nagan H, et al. (2007) Parasitism of *Trichoderma* on  
522 *Meloidogyne javanica* and role of the gelatinous matrix. *European Journal of Plant Pathology* 118:  
523 247-258.
- 524 40. Bird DM, Kaloshian I (2003) Are roots special? Nematodes have their say. *Physiological and Molecular*  
525 *Plant Pathology* 62: 115-123.
- 526 41. Affokpon A, Coyne DL, Htay CC, Agbèdè RD, Lawouin L, et al. (2011) Biocontrol potential of native  
527 *Trichoderma* isolates against root-knot nematodes in West African vegetable production systems.  
528 *Soil Biology and Biochemistry* 43: 600-608.
- 529 42. Thorn RG, Barron GL (1984) Carnivorous mushrooms. *Science* 224: 76-78.
- 530 43. Kwok OCH, Plattner, Weisleder, Wicklow D (1992) A nematicidal toxin from *Pleurotus ostreatus* NRRL  
531 3526. *Journal of Chemical Ecology* 18: 127-137.
- 532 44. Tan Q, Chen G, Zeng G, Chen A, Guan S, et al. (2015) Physiological fluxes and antioxidative enzymes  
533 activities of immobilized *Phanerochaete chrysosporium* loaded with TiO<sub>2</sub> nanoparticles after  
534 exposure to toxic pollutants in solution. *Chemosphere* 128: 21-27.

- 535 45. Kadri T, Rouissi T, Kaur Brar S, Cledon M, Sarma S, et al. (2017) Biodegradation of polycyclic aromatic  
536 hydrocarbons (PAHs) by fungal enzymes: A review. *J Environ Sci (China)* 51: 52-74.
- 537 46. Su Y, Xian H, Shi S, Zhang C, Manik SM, et al. (2016) Biodegradation of lignin and nicotine with white rot  
538 fungi for the delignification and detoxification of tobacco stalk. *BMC Biotechnol* 16: 81.
- 539 47. Hu L, Zeng G, Chen G, Dong H, Liu Y, et al. (2016) Treatment of landfill leachate using immobilized  
540 *Phanerochaete chrysosporium* loaded with nitrogen-doped TiO<sub>2</sub> nanoparticles. *J Hazard Mater*  
541 301: 106-118.
- 542 48. Herve V, Ketter E, Pierrat JC, Gelhaye E, Frey-Klett P (2016) Impact of *Phanerochaete chrysosporium* on  
543 the Functional Diversity of Bacterial Communities Associated with Decaying Wood. *PLoS One* 11:  
544 e0147100.
- 545 49. Wei B-Q, Xue Q-Y, Wei L-H, Niu D-D, Liu H-X, et al. (2009) A novel screening strategy to identify  
546 biocontrol fungi using protease production or chitinase activity against *Meloidogyne* root-knot  
547 nematodes. *Biocontrol Science and Technology* 19: 859-870.
- 548 50. Yang J, Huang X, Tian B, Wang M, Niu Q, et al. (2005) Isolation and characterization of a serine protease  
549 from the nematophagous fungus, *Lecanicillium psalliotae*, displaying nematocidal activity.  
550 *Biotechnol Lett* 27: 1123-1128.
- 551 51. Thorn G, Tsuneda A (1993) Interactions between *Pleurotus* species, nematodes, and bacteria on agar  
552 and in wood. *Transactions of the Mycological Society of Japan* 34: 449-464.
- 553

555 **Table 1** Effects of treatment timing and conidial concentration of the *Phanerochaete*  
 556 *chrysosporium* strain B-22 suspension on the mortality of second stage juveniles (J2) of  
 557 *Meloidogyne incognita*. Values within columns followed by different lowercase letters are  
 558 significantly different at 0.05 level.

| Time<br>(h) | Conidial concentration                           |               | Corrected<br>mortality<br>rates (%) | Linear<br>regression<br>equation | Correlation<br>coefficient | LC <sub>50</sub><br>(× 10 <sup>8</sup><br>conidia<br>mL <sup>-1</sup> ) |
|-------------|--------------------------------------------------|---------------|-------------------------------------|----------------------------------|----------------------------|-------------------------------------------------------------------------|
|             | (× 10 <sup>7</sup> conidia<br>mL <sup>-1</sup> ) | Mortality (%) |                                     |                                  |                            |                                                                         |
| 24          | 30                                               | 50.1 ± 1.0d   | 42.8                                | Y = 0.7511 × X<br>+ 22.91        | 0.8539                     | 3.6                                                                     |
|             | 15                                               | 46.7 ± 1.3f   | 38.9                                |                                  |                            |                                                                         |
|             | 7.5                                              | 40.2 ± 1.0g   | 31.5                                |                                  |                            |                                                                         |
|             | 3.75                                             | 33.2 ± 1.4h   | 23.4                                |                                  |                            |                                                                         |
|             | 1.875                                            | 31.6 ± 0.5h   | 21.6                                |                                  |                            |                                                                         |
|             | Control                                          | 12.7 ± 1.179i | --                                  |                                  |                            |                                                                         |
| 48          | 30                                               | 62.0 ± 1.17bc | 54.5                                | Y = 0.9246 × X<br>+ 28.19        | 0.9681                     | 2.4                                                                     |
|             | 15                                               | 53.6 ± 1.2de  | 44.4                                |                                  |                            |                                                                         |
|             | 7.5                                              | 47.6 ± 0.83ef | 37.3                                |                                  |                            |                                                                         |
|             | 3.75                                             | 41.7 ± 0.65g  | 30.2                                |                                  |                            |                                                                         |
|             | 1.875                                            | 40.1 ± 0.95g  | 28.3                                |                                  |                            |                                                                         |
|             | Control                                          | 16.4 ± 0.4i   | --                                  |                                  |                            |                                                                         |
| 72          | 30                                               | 76.6 ± 1.1a   | 71.9                                | Y = 1.16 × X<br>+ 38.85          | 0.944                      | 0.96                                                                    |
|             | 15                                               | 65.4 ± 2.4b   | 58.4                                |                                  |                            |                                                                         |
|             | 7.5                                              | 60.2 ± 0.92c  | 52.2                                |                                  |                            |                                                                         |
|             | 3.75                                             | 50.6 ± 0.9def | 40.6                                |                                  |                            |                                                                         |
|             | 1.875                                            | 48.9 ± 0.6f   | 38.6                                |                                  |                            |                                                                         |
|             | Control                                          | 16.7 ± 0.35i  | --                                  |                                  |                            |                                                                         |

560

561 **Table 2** Controlling effects of *Phanerochaete chrysosporium* strain B-22 at different concentrations against *Meloidogyne incognita*.

562 Values within columns followed by different lowercase letters are significantly different at 0.05 level.

| Treatment<br>(cfu mL <sup>-1</sup> ) | Females in<br>root (ind 2<br>g <sup>-1</sup> ) | Inhibition<br>ratio (%) | Egg mass in<br>root<br>(ind 2 g <sup>-1</sup> ) | Inhibition ratio<br>(%) | Juveniles in<br>root<br>(ind 2 g <sup>-1</sup> ) | Inhibition<br>ratio (%) | Juveniles in<br>soil<br>(ind 2 g <sup>-1</sup> ) | Inhibition<br>ratio (%) | Gall index<br>in root | Inhibition<br>ratio (%) |
|--------------------------------------|------------------------------------------------|-------------------------|-------------------------------------------------|-------------------------|--------------------------------------------------|-------------------------|--------------------------------------------------|-------------------------|-----------------------|-------------------------|
| $3 \times 10^8$                      | 10 ± 1d                                        | 84.46                   | 20 ± 1d                                         | 84.25                   | 31 ± 3e                                          | 78.91                   | 113 ± 3e                                         | 89.18                   | 0.8 ± 0.3e            | 79.48                   |
| $1.5 \times 10^8$                    | 19 ± 1c                                        | 70.76                   | 39 ± 1c                                         | 69.29                   | 49 ± 2d                                          | 66.66                   | 144 ± 3de                                        | 86.22                   | 1.2 ± 0.2d            | 69.23                   |
| $7.5 \times 10^7$                    | 25 ± 2c                                        | 61.53                   | 42 ± 2c                                         | 66.92                   | 56 ± 2d                                          | 61.90                   | 199 ± 7d                                         | 80.95                   | 1.6 ± 0.3c            | 58.97                   |
| $3.75 \times 10^7$                   | 33 ± 1bc                                       | 49.23                   | 59 ± 2b                                         | 53.54                   | 67 ± 2c                                          | 54.42                   | 236 ± 7c                                         | 77.41                   | 2.4 ± 0.3bc           | 38.46                   |
| $1.875 \times 10^7$                  | 35 ± 2b                                        | 46.15                   | 63 ± 3b                                         | 50.39                   | 80 ± 4b                                          | 45.57                   | 329 ± 9b                                         | 68.51                   | 2.6 ± 0.2b            | 33.33                   |
| Control                              | 65 ± 1a                                        | -                       | 127 ± 2a                                        | -                       | 147 ± 4a                                         | -                       | 1045 ± 12a                                       | -                       | 3.9 ± 0.7a            | -                       |
| Normal                               | 0e                                             | -                       | 0e                                              | -                       | 0f                                               | -                       | 0f                                               | -                       | 0f                    | -                       |

564 **Table 3** Effects of *Phanerochaete chrysosporium* strain B-22 at different concentrations on tomato plant growth.

565 Values within columns followed by different lowercase letters are significantly different at 0.05 level.

566

| Conidial concentration<br>(cfu mL <sup>-1</sup> ) | Plant height<br>(cm) | Increase (%) | Root length               |              | Aboveground                            |              | Root fresh                       |              |
|---------------------------------------------------|----------------------|--------------|---------------------------|--------------|----------------------------------------|--------------|----------------------------------|--------------|
|                                                   |                      |              | (cm plant <sup>-1</sup> ) | Increase (%) | fresh mass<br>(g plant <sup>-1</sup> ) | Increase (%) | mass<br>(g plant <sup>-1</sup> ) | Increase (%) |
| $3 \times 10^8$                                   | 29.3 ± 2.3a          | 202.06       | 26.0 ± 4.2a               | 185.71       | 7.9 ± 1.2a                             | 426.66       | 1.1 ± 0.40a                      | 292.85       |
| $1.5 \times 10^8$                                 | 24.9 ± 3.1b          | 156.70       | 20.8 ± 3.3b               | 128.57       | 4.6 ± 0.9b                             | 206.66       | 0.77 ± 0.21b                     | 175          |
| $7.5 \times 10^7$                                 | 16.4 ± 2.7c          | 69.07        | 18.0 ± 5.2c               | 97.80        | 3.9 ± 0.8c                             | 160          | 0.65 ± 0.33c                     | 132.14       |
| $3.75 \times 10^7$                                | 11.9 ± 4.5d          | 22.68        | 14.1 ± 3.7d               | 54.94        | 3.3 ± 1.1d                             | 120          | 0.64 ± 0.21c                     | 128.57       |
| $1.875 \times 10^7$                               | 11.6 ± 4.8de         | 19.58        | 13.3 ± 4.1de              | 46.15        | 3.1 ± 0.5d                             | 106.66       | 0.55 ± 0.34cd                    | 96.42        |
| Normal                                            | 11.3 ± 3.7e          | 16.49        | 12.8 ± 3.7e               | 40.65        | 3.0 ± 1.3d                             | 100          | 0.50 ± 0.30d                     | 78.57        |
| Control                                           | 9.7 ± 2.1f           | -            | 9.1 ± 3.4f                | -            | 1.5 ± 0.5e                             | -            | 0.28 ± 0.27e                     | -            |

568 **Figure legends**

569

570 **Fig. 1** Parasitism by *Phanerochaete chrysosporium* strain B-22 on the eggs of  
571 *Meloidogyne incognita*. (a) Spores germinated, and short hyphae developed around the egg;  
572 (b) hyphae penetrated across the egg shell; (c) the egg shell was dissolved. (e) Control:  
573 healthy, intact eggs. All observations were under 40x magnification.

574

575 **Fig. 2** Parasitism of *Phanerochaete chrysosporium* strain B-22 on the second stage  
576 juveniles (J2) of *Meloidogyne incognita*. (a) Spores were in contact with J2 (20x  
577 magnification); (b) spores geminated, and hyphae grew out from the bodies of J2 (40x  
578 magnification); (c) more mycelium was produced from the bodies of J2 (20x  
579 magnification); (d) the cuticle of J2 was bent and shrunken (40x magnification); (e) J2  
580 were parasitized by strain B-22 hyphae (20x magnification). (f) Control: healthy J2 (20x  
581 magnification).

582

583 **Fig. 3** Parasitism of *Phanerochaete chrysosporium* strain B-22 on adult females of  
584 *Meloidogyne incognita*. (a) Spores geminated, and the contents of the adult female bodies  
585 leaked out; (b) dense hyphae crossed the adult female body, which was partly dissolved. (c)  
586 Control: healthy adult female. All observations were under 10x magnification.

587



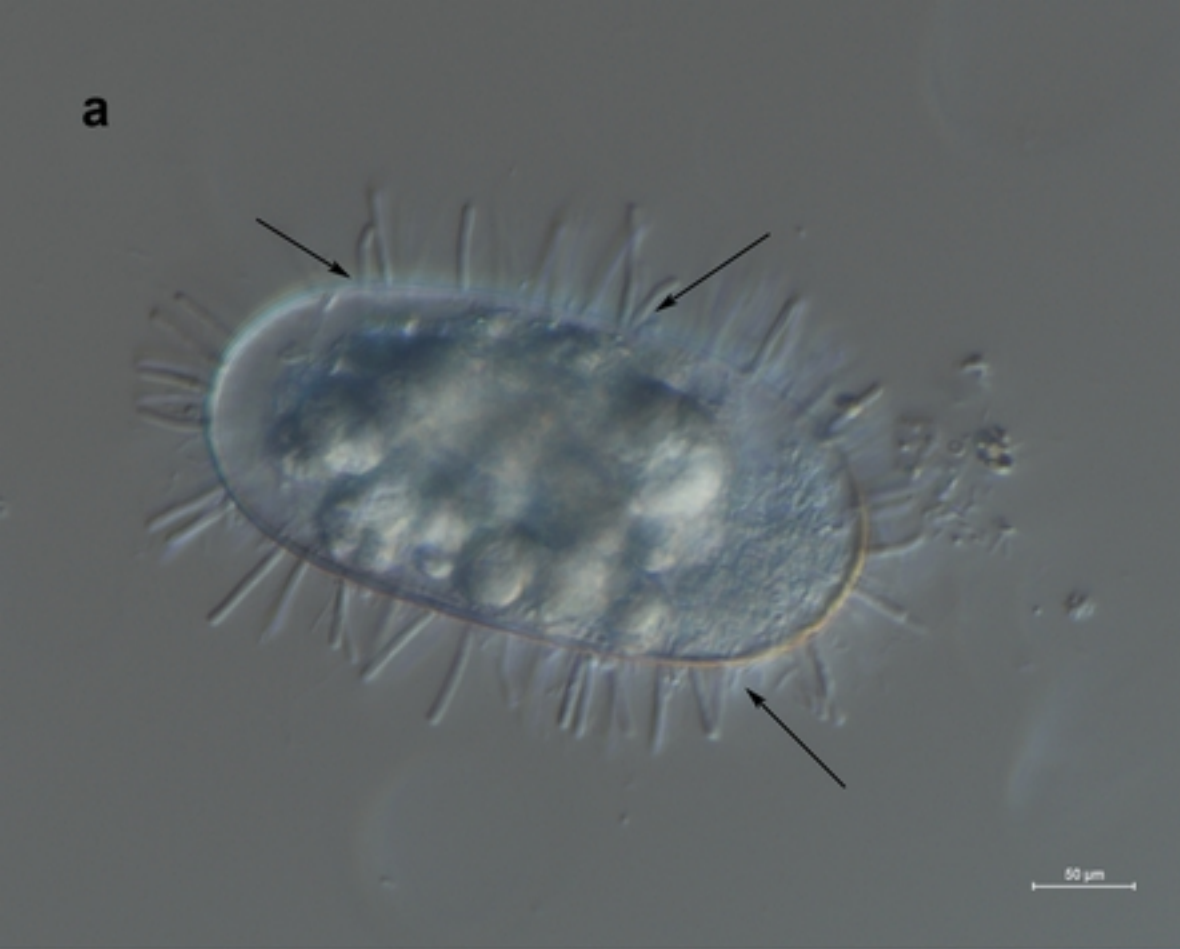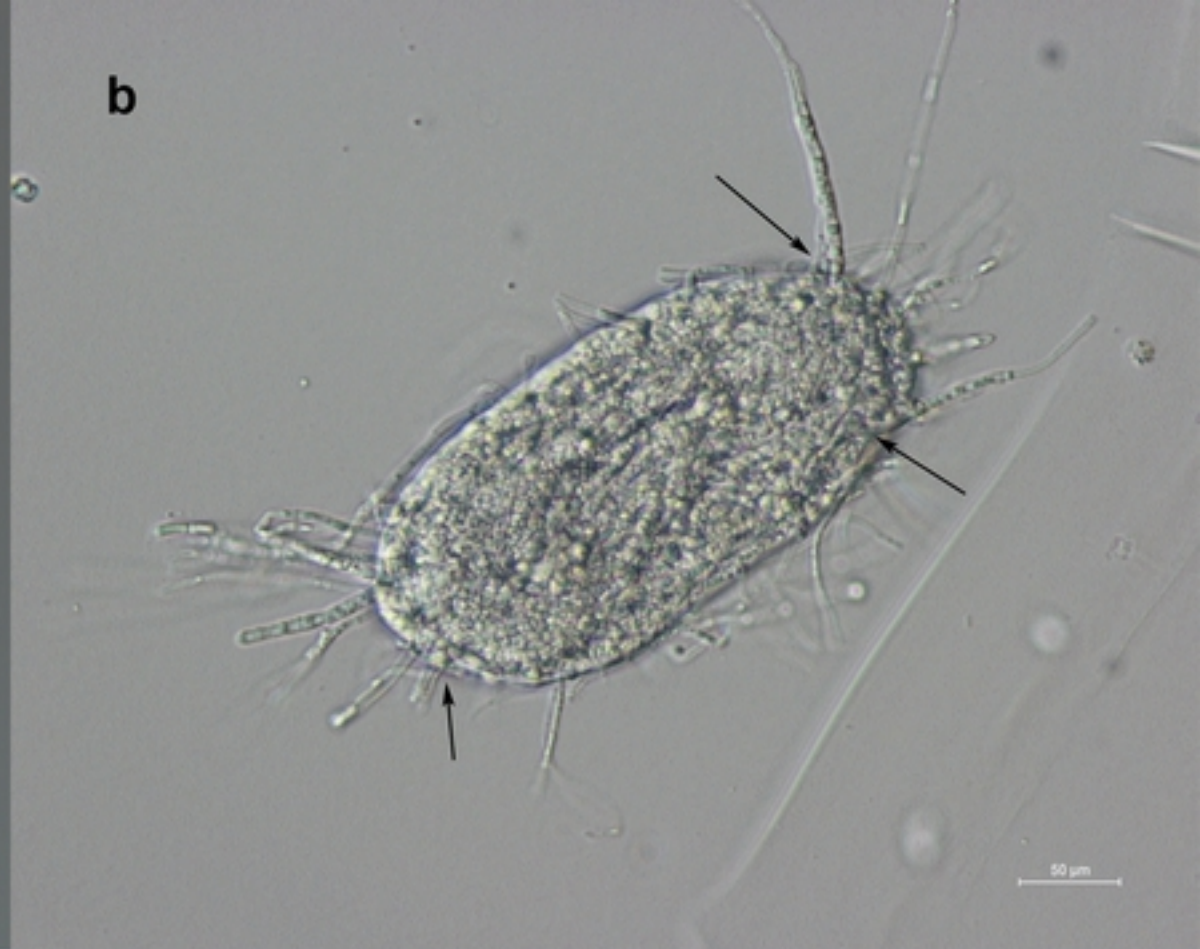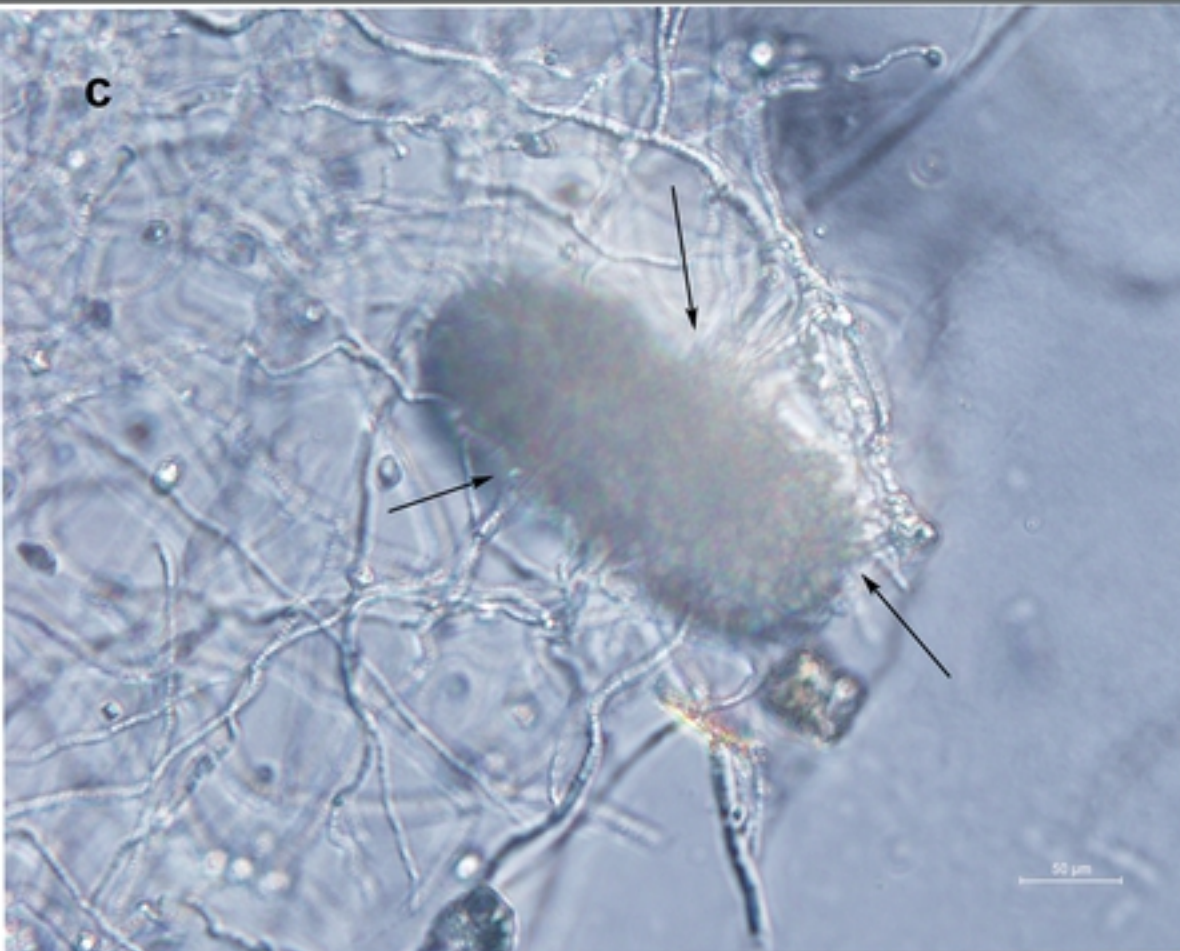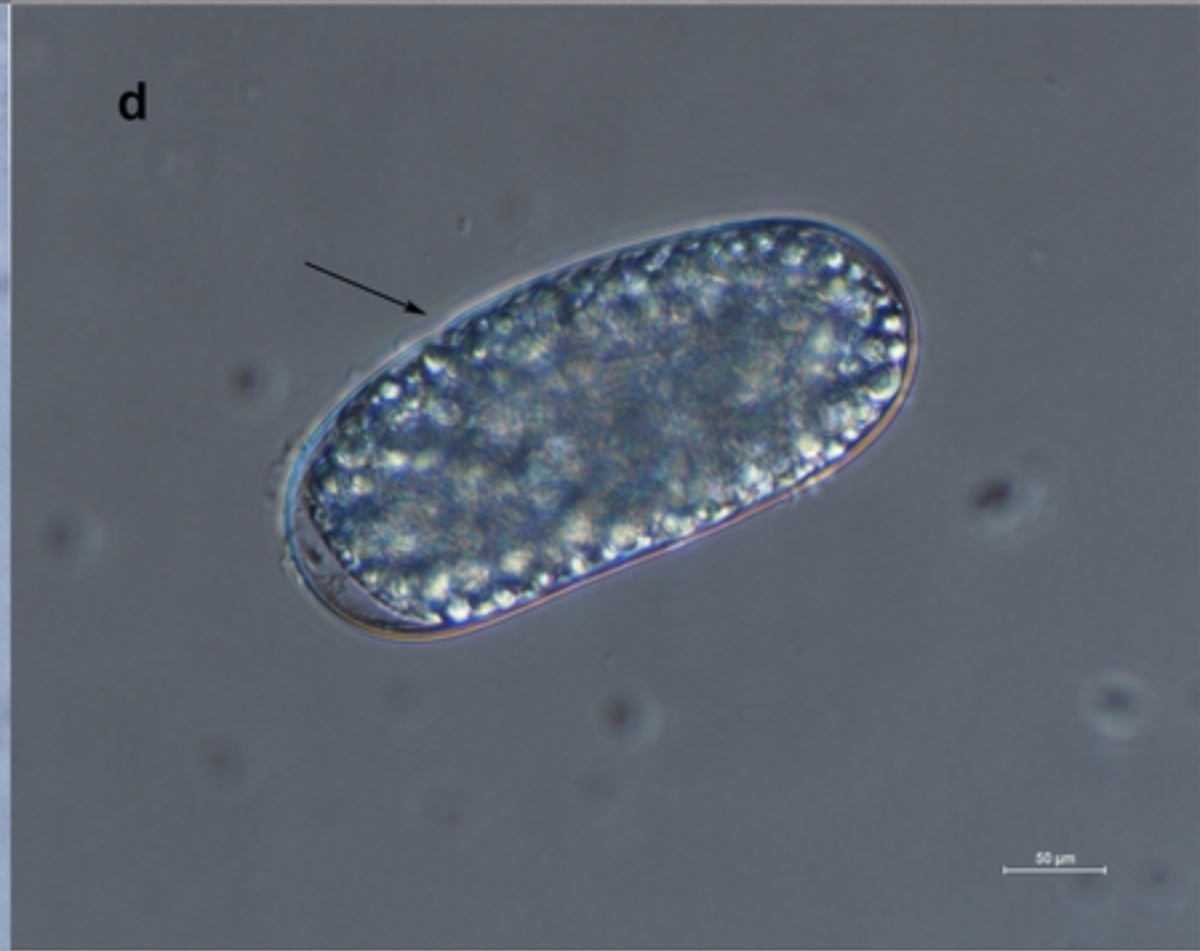

Figure.1

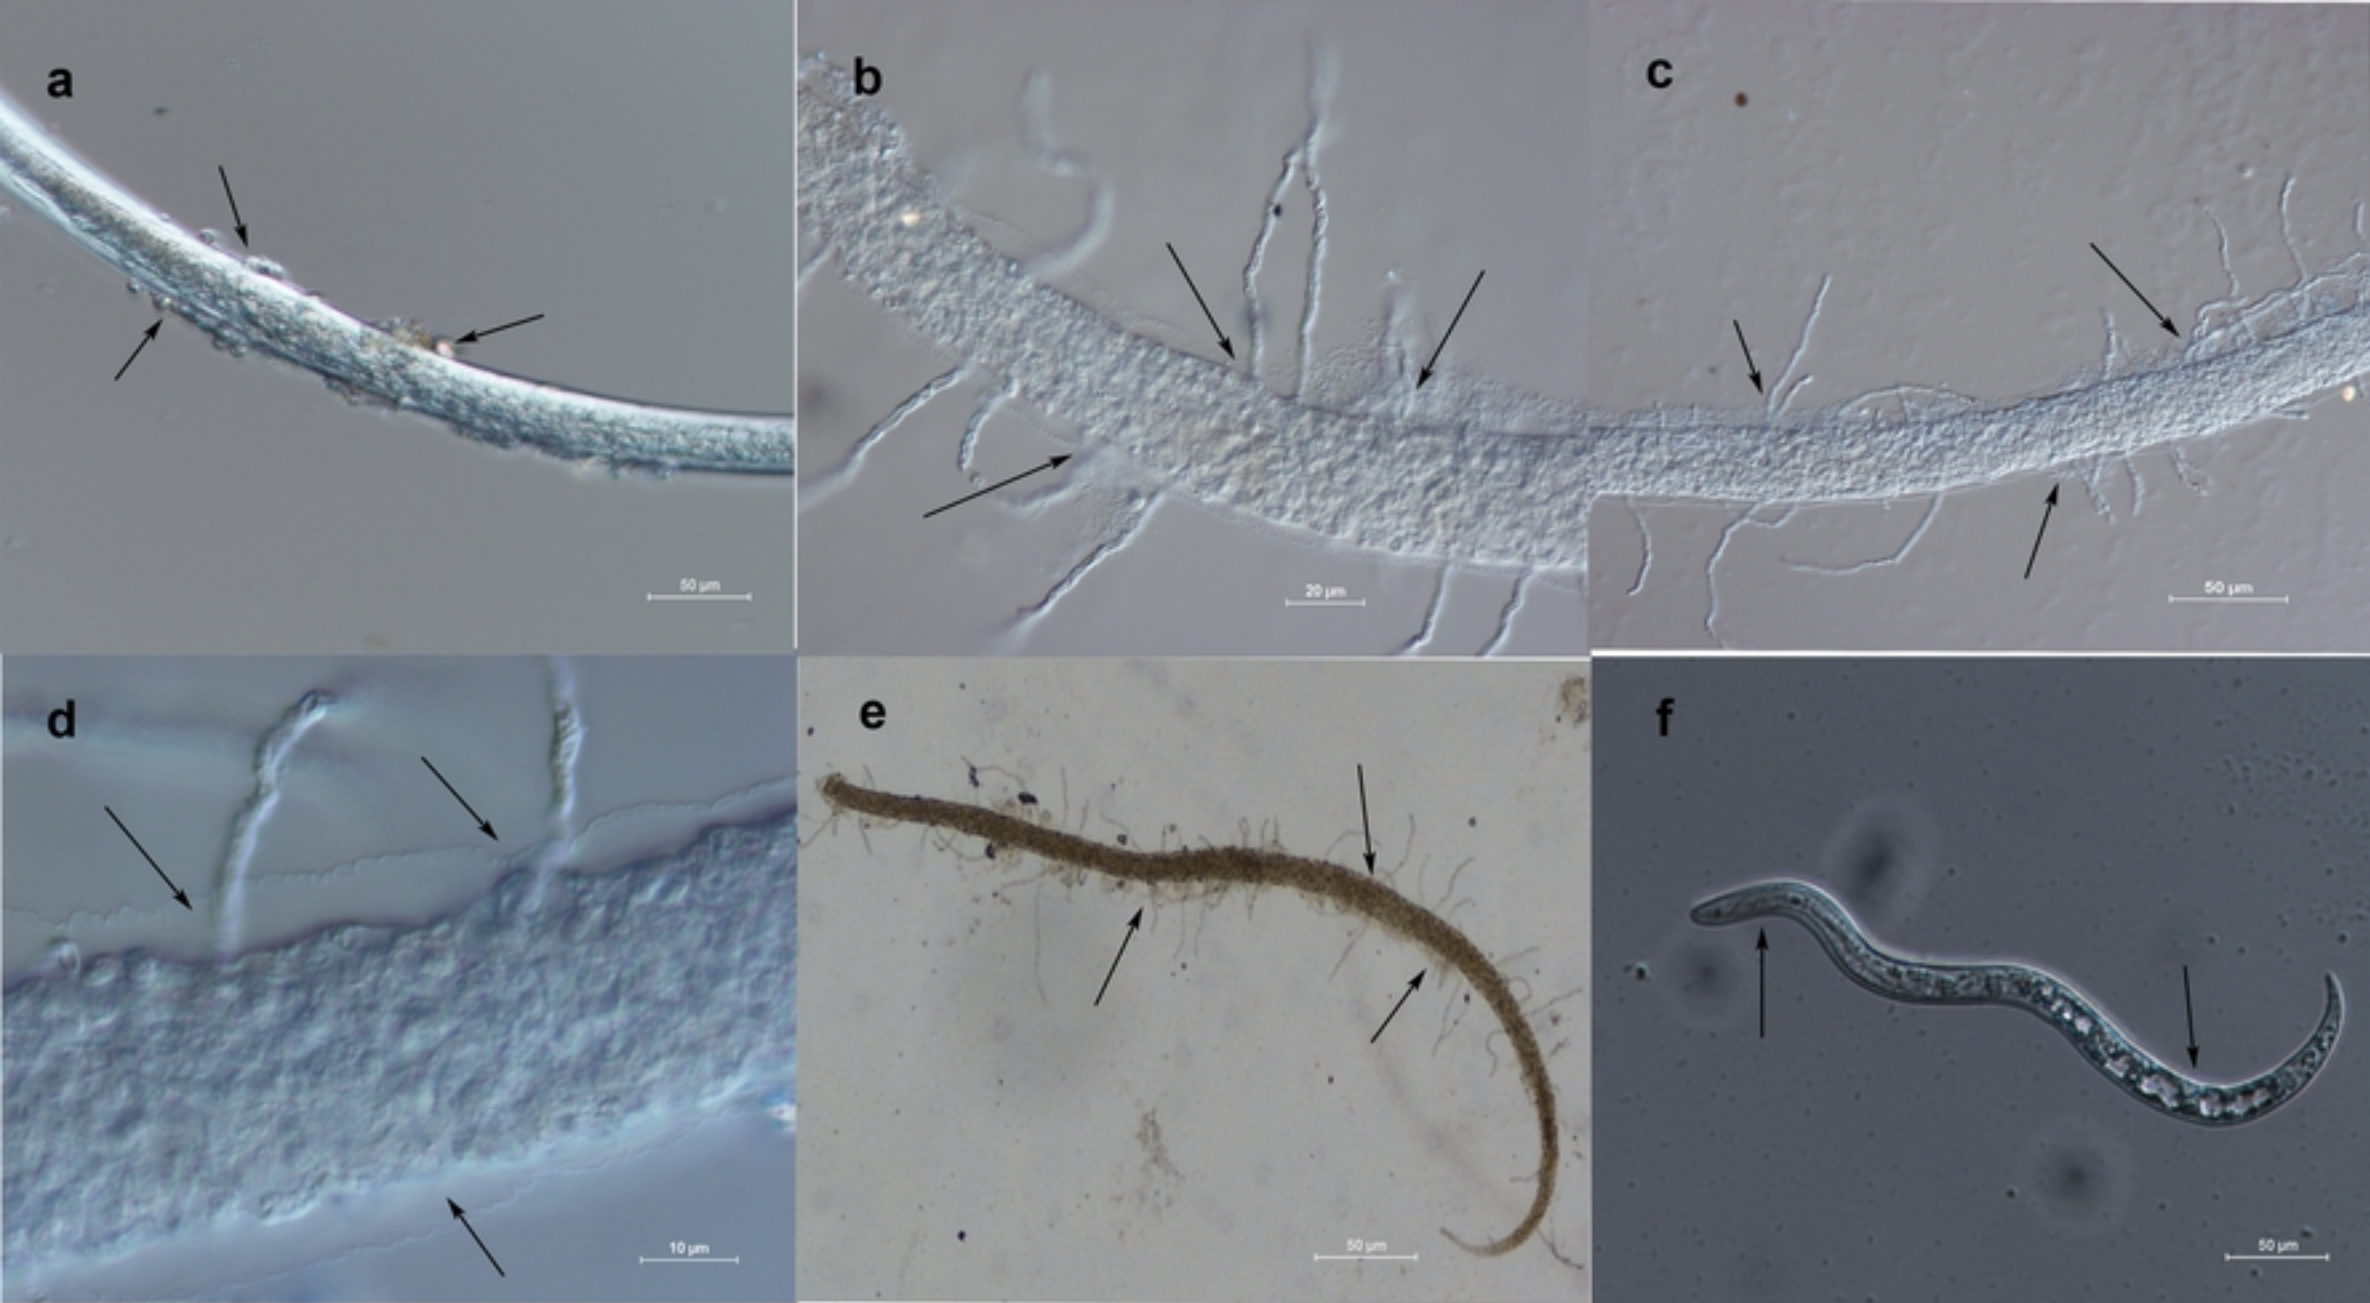

Figure.2

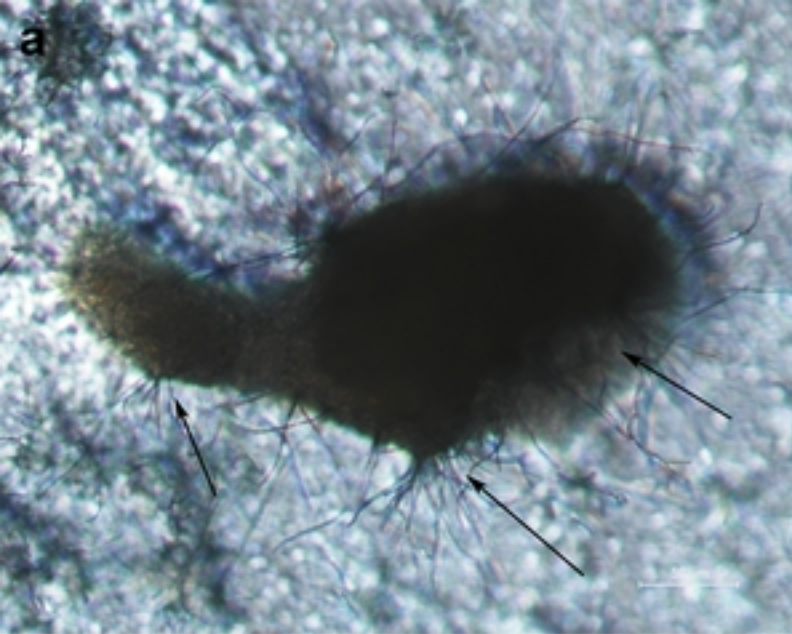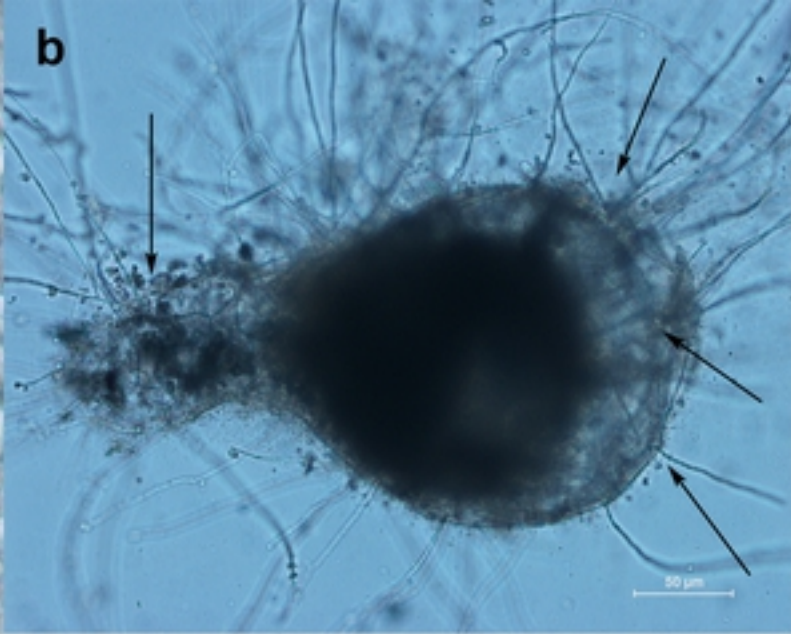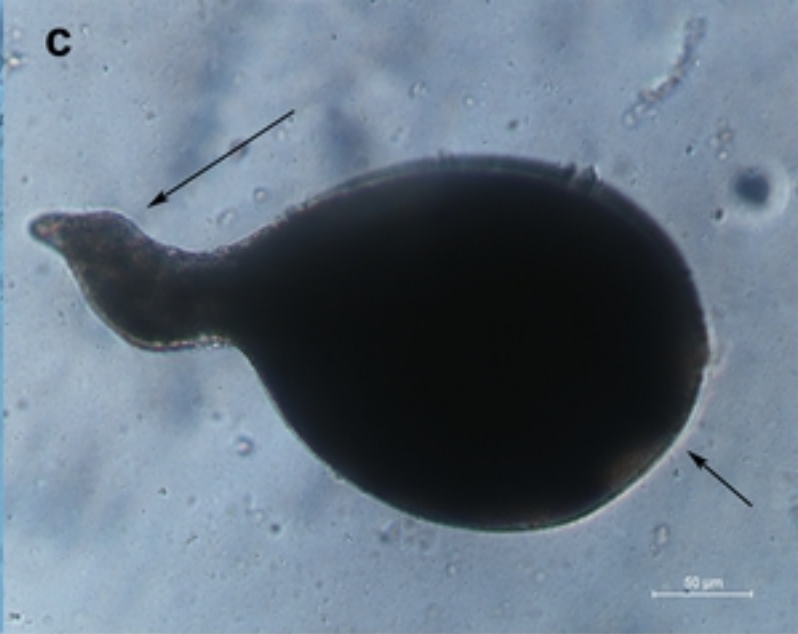

Figure.3
